# Supplementary material for: SAGIT®: clinician-reported outcome instrument for managing acromegaly in clinical practice—development and results from a pilot study
Source: Springer Nature journal article supplement (doi:10.1007/s11102-015-0681-2), 2015-09-16
Supplement: MOESM1 [file 8954354]

Supplemental figures and tables

Supplemental Fig. 1 Stepwise development process for the SAGIT instrument

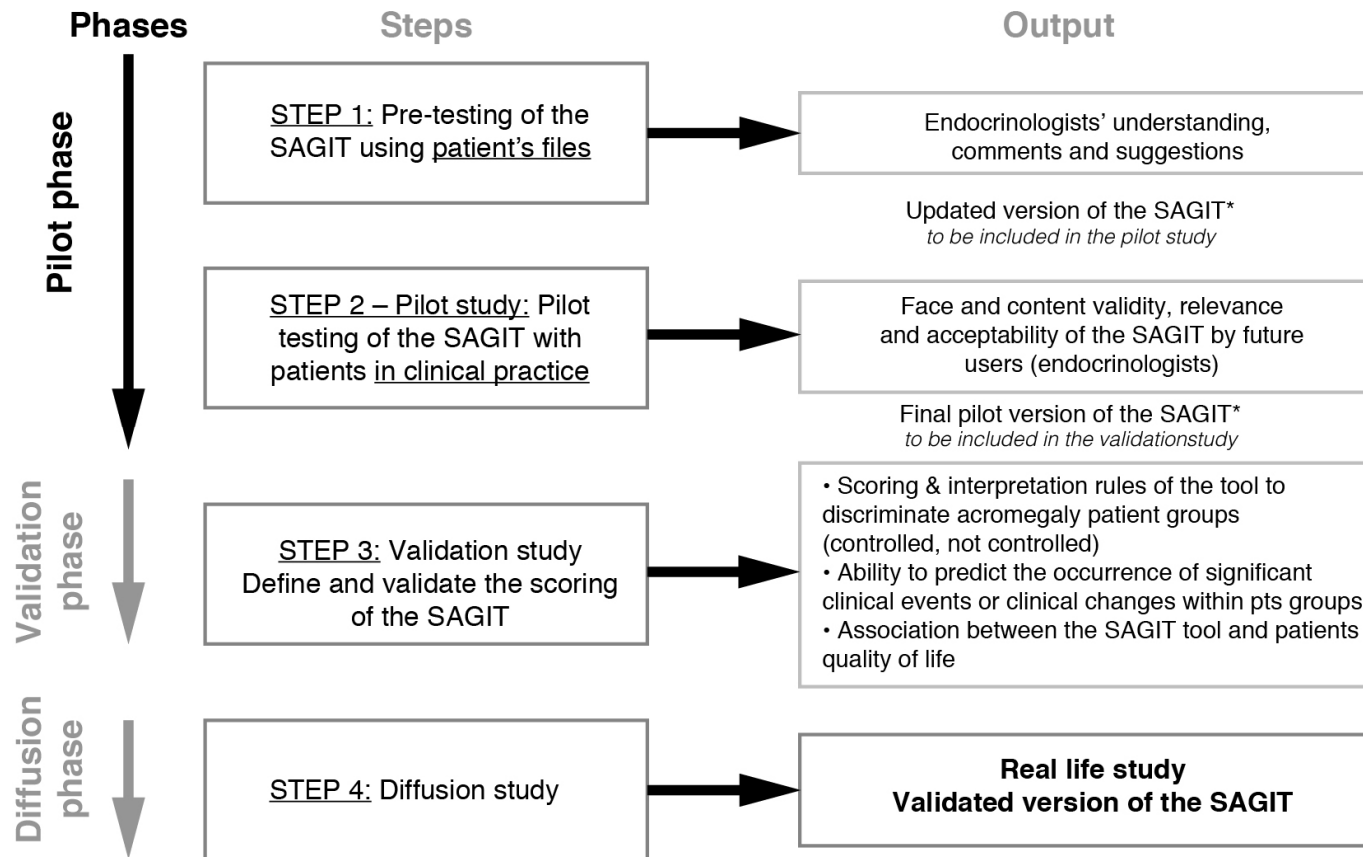

**Supplemental Table 1** Characteristics of endocrinologist population included in Step 1 pre-testing and Step 2 pilot study according to country

| Characteristics                                           | Step-1 pre-testing (n=11) |        |         |       |       |       | Step 2 prospective pilot study (n=9) |         |       |       |       | Step 2 retrospective pilot study (n=4) |                 |
|-----------------------------------------------------------|---------------------------|--------|---------|-------|-------|-------|--------------------------------------|---------|-------|-------|-------|----------------------------------------|-----------------|
|                                                           | Brazil                    | France | Germany | Italy | Spain | UK    | France                               | Germany | Italy | Spain | USA   | Brazil                                 | UK              |
| Number of endocrinologists                                | 2                         | 2      | 1       | 2     | 2     | 2     | 2                                    | 1       | 2     | 2     | 2     | 2                                      | 2               |
| Age (years) <sup>a</sup>                                  | 47–48                     | 40–58  | 32      | 40–48 | 53    | 45–47 | 41–54                                | 43      | 34–44 | 34–56 | 42–44 | 38–48                                  | 48 <sup>b</sup> |
| Mode of practice <sup>c</sup>                             |                           |        |         |       |       |       |                                      |         |       |       |       |                                        |                 |
| Outpatient clinic                                         | 1                         | 0      | 0       | 0     | 1     | 2     | 0                                    | 1       | 1     | 1     | 0     | 2                                      | 2               |
| Hospital                                                  | 1                         | 2      | 1       | 2     | 1     | 2     | 2                                    | 1       | 2     | 1     | 2     | 0                                      | 0               |
| Number of years treating acromegaly patients <sup>a</sup> | 15–20                     | 10–30  | 2       | 8–20  | 23–25 | 11–18 | 12–24                                | 12      | 7–10  | 3–30  | 3–30  | 10–14                                  | 10–19           |
| Number of acromegaly patients seen per month <sup>a</sup> | 10–60                     | 2–30   | 5–10    | 10–40 | 10–12 | 2–5   | 3–10                                 | 10      | 3–6   | 4–10  | 10–15 | 12–80                                  | 1–10            |

<sup>a</sup>Range; <sup>b</sup>Missing data; <sup>c</sup>Some endocrinologists worked in both outpatient clinics and hospitals

**Supplemental Table 2** Endocrinologists' feedback (via telephone interview) on items in each section of the SAGIT instrument during Step 1 pre-testing and Step 2 retrospective pilot study

| Sections of SAGIT                   | General comments/difficulties reported                                                                                                                                                                                                                                                                                                                                                     |                                                                                                                                                                                                                                                                 |
|-------------------------------------|--------------------------------------------------------------------------------------------------------------------------------------------------------------------------------------------------------------------------------------------------------------------------------------------------------------------------------------------------------------------------------------------|-----------------------------------------------------------------------------------------------------------------------------------------------------------------------------------------------------------------------------------------------------------------|
|                                     | Step 1 pre-testing (original instrument)                                                                                                                                                                                                                                                                                                                                                   | Step 2 retrospective pilot study (pilot instrument)                                                                                                                                                                                                             |
| <b>Title</b>                        | <ul style="list-style-type: none"> <li>• Informative</li> <li>• No need for improvement</li> </ul>                                                                                                                                                                                                                                                                                         | <ul style="list-style-type: none"> <li>• No issues reported, except for the need to adapt the first page for clinical study</li> </ul>                                                                                                                          |
| <b>Signs and symptoms (S)</b>       | <ul style="list-style-type: none"> <li>• Lack of instructions on how to score each item, how to interpret the score, and how to account for the severity ranking</li> <li>• List of symptoms fine; some additional symptoms proposed (e.g. acral changes, fatigue/asthenia, visual symptoms, paraesthesia in feet or legs, skin changes, facial dysmorphism, cardiopathy)</li> </ul>       | <ul style="list-style-type: none"> <li>• No major issues</li> <li>• Need for "cosmetic" changes only</li> <li>• Comorbidity "swelling" needs to be more explicit or reworded because it does not apply exactly to what patients with acromegaly have</li> </ul> |
| <b>Associated comorbidities (A)</b> | <ul style="list-style-type: none"> <li>• Lack of instructions on how to score each item, how to interpret the score, and how to account for the severity ranking</li> <li>• List of comorbidities fine; additional comorbidities proposed (e.g. visual signs, intestinal polyps, obesity, cancer)</li> <li>• Definition needed for each comorbidity listed</li> </ul>                      | <ul style="list-style-type: none"> <li>• Comorbidity "swelling" needs to be more explicit or reworded because it does not apply exactly to what patients with acromegaly have</li> </ul>                                                                        |
| <b>GH levels (G)</b>                | <ul style="list-style-type: none"> <li>• Well understood</li> <li>• Ranges and units well adapted but loss of sensitivity for small improvements because ranges of the concentration categories are too large</li> <li>• GH nadir with OGTT and GH random or series not always reported in the patient's medical record, or not always performed routinely at each consultation</li> </ul> | <ul style="list-style-type: none"> <li>• Need to highlight the "OR" between GH nadir with OGTT and GH random or series</li> </ul>                                                                                                                               |

- |                          |                                                                                                                                                                                                                                                                                                                         |                                                                                |
|--------------------------|-------------------------------------------------------------------------------------------------------------------------------------------------------------------------------------------------------------------------------------------------------------------------------------------------------------------------|--------------------------------------------------------------------------------|
| <b>GH levels (G)</b>     | <ul style="list-style-type: none"> <li>• Highest concentration of GH nadir with OGTT proposed is not high enough</li> <li>• Meaning of “series” not understood</li> </ul>                                                                                                                                               |                                                                                |
| <b>IGF-1 levels (I)</b>  | <ul style="list-style-type: none"> <li>• Well understood</li> <li>• Ranges and units well adapted, but loss of sensitivity for small improvements because concentration ranges are too large</li> </ul>                                                                                                                 | <ul style="list-style-type: none"> <li>• No changes required</li> </ul>        |
| <b>Tumor profile (T)</b> | <ul style="list-style-type: none"> <li>• Some categories are not sensitive enough</li> <li>• Important to differentiate invasive from non-invasive tumors, parasellar/laterosellar versus intrasellar versus suprasellar tumors, sinus versus chiasm versus cavernous sinus versus sphenoidal sinus invasion</li> </ul> | <ul style="list-style-type: none"> <li>• More precision is required</li> </ul> |

---

GH, growth hormone; IGF-1, insulin-like growth hormone-1; OGTT, oral glucose tolerance test



**Supplemental Table 4** Practical aspects of the SAGIT instrument: results of the PRAC-Test® questionnaire in each country during Step 1 pre-testing and Step 2 pilot study

| Practical aspects of SAGIT | Step-1 pre-testing |                 |                  |                |                |             |                 | Step 2 pilot study |                  |                |                |              |                   |                 |             |                 |
|----------------------------|--------------------|-----------------|------------------|----------------|----------------|-------------|-----------------|--------------------|------------------|----------------|----------------|--------------|-------------------|-----------------|-------------|-----------------|
|                            | Brazil<br>(n=2)    | France<br>(n=2) | Germany<br>(n=1) | Italy<br>(n=2) | Spain<br>(n=2) | UK<br>(n=2) | TOTAL<br>(n=11) | Prospective        |                  |                |                |              | Retrospective     |                 |             |                 |
|                            |                    |                 |                  |                |                |             |                 | France<br>(n=2)    | Germany<br>(n=1) | Italy<br>(n=2) | Spain<br>(n=2) | USA<br>(n=2) | SUBTOTAL<br>(n=9) | Brazil<br>(n=2) | UK<br>(n=2) | TOTAL<br>(n=13) |
| Easy to understand         | 2                  | 2               | 1                | 1              | 1              | 2           | 9               | 2                  | 1                | 2              | 2              | 1            | 8                 | 1               | 2           | 11              |
| Concise                    | 2                  | 2               | 1                | 2              | 2              | 2           | 11              | 2                  | 1                | 2              | 1              | 2            | 8                 | 2               | 2           | 12              |
| Precise                    | 1                  | 2               | 1                | 1              | 1              | 1           | 7               | 1                  | 1                | 2              | 1              | 1            | 6                 | 1               | 2           | 9               |
| Informative                | 2                  | 2               | 1                | 2              | 1              | 2           | 10              | 2                  | 0                | 2              | 2              | 1            | 7                 | 1               | 2           | 10              |
| Practical                  | 2                  | 1 <sup>a</sup>  | 1                | 2              | 1              | 2           | 9 <sup>a</sup>  | 0                  | 0                | 2              | 2              | 1            | 5 <sup>a</sup>    | 1               | 2           | 8 <sup>a</sup>  |
| Simple                     | 2                  | 1 <sup>a</sup>  | 1                | 1              | 2              | 2           | 9 <sup>a</sup>  | 2                  | 0                | 2              | 2              | 1            | 7                 | 2               | 2           | 11              |
| Exhaustive                 | 0                  | 0               | 0                | 1              | 1              | 1           | 3 <sup>a</sup>  | 1                  | 1                | 2              | 0              | 1            | 5                 | 0               | 1           | 6               |
| Quick to complete          | 2                  | 1 <sup>a</sup>  | 1                | 2              | 2              | 2           | 10 <sup>a</sup> | 2                  | 0                | 2              | 2              | 1            | 7                 | 2               | 2           | 11              |
| Unbiased                   | 1                  | 1 <sup>a</sup>  | 1                | 2              | 2              | 2           | 9 <sup>a</sup>  | 1                  | 1                | 2              | 2              | 2            | 8                 | 2               | 2           | 12              |

<sup>a</sup>One data point missing

**Supplemental Table 5** Baseline characteristics of patients who took part in Step 2 pilot study

| Characteristics                         | Disease/treatment status            |                                      |                       | Total (n=26) |
|-----------------------------------------|-------------------------------------|--------------------------------------|-----------------------|--------------|
|                                         | Stable/controlled acromegaly (n=10) | Active/uncontrolled acromegaly (n=9) | Treatment naïve (n=7) |              |
| Age (years)                             |                                     |                                      |                       |              |
| Mean                                    | 57.8                                | 45.0                                 | 45.3                  | 50.0         |
| Median (range)                          | 58.5 (44–73)                        | 44.0 (19–77)                         | 44.0 (31–63)          | 49.0 (19–77) |
| Gender (n)                              |                                     |                                      |                       |              |
| Male                                    | 5                                   | 4                                    | 3                     | 12           |
| Female                                  | 5                                   | 5                                    | 4                     | 14           |
| Time since acromegaly diagnosis (years) |                                     |                                      |                       |              |
| Mean                                    | 7.5                                 | 2.6                                  | 0.1                   | 3.8          |
| Median (range)                          | 6.0 (1–22)                          | 2.0 (1–5)                            | 0.0 (0–1)             | 2.0 (0–22)   |
